# Supplementary material for: Higher Rates of Persistence and Adherence in Patients with Type 2 Diabetes Initiating Once-Weekly vs Daily Injectable Glucagon-Like Peptide-1 Receptor Agonists in US Clinical Practice (STAY Study)
Source: PubMed Central journal article supplement — Diabetes Ther. 2021 Dec 16;13(1):175–87. doi: 10.1007/s13300-021-01189-6 (PMC8776963; doi:10.1007/s13300-021-01189-6), 2021-12-16
Supplement: 13300_2021_1189_MOESM1_ESM.pdf [file 13300_2021_1189_MOESM1_ESM.pdf]

Higher Rates of Persistence and Adherence in Patients with Type 2 Diabetes  
Initiating Once-weekly Versus Daily Injectable Glucagon-like Peptide-1  
Receptor Agonists in US Clinical Practice (STAY Study)

William H. Polonsky,<sup>1,2</sup> Riya Arora,<sup>3</sup> Mads Faurby,<sup>4</sup> João Fernandes,<sup>4,5</sup> Andreas Liebl<sup>6</sup>

<sup>1</sup>Behavioral Diabetes Institute, San Diego, CA, USA

<sup>2</sup>University of California, San Diego, CA, USA

<sup>3</sup>Novo Nordisk Service Centre Pvt Ltd, Bangalore, India

<sup>4</sup>Novo Nordisk A/S, Søborg, Denmark

<sup>5</sup>Present address: Ferring Pharmaceuticals A/S, Copenhagen, Denmark

<sup>6</sup>Center for Diabetes and Metabolism, m&i-Fachklinik Bad Heilbrunn, Bad Heilbrunn, Germany

**Corresponding author:** William Polonsky; [whp@behavioraldiabetes.org](mailto:whp@behavioraldiabetes.org)

SUPPLEMENTAL TABLES AND FIGURES

**Table S1** Study attrition

|                                                                                                                                                                               | <b>Once-weekly<br/>GLP-1 RAs</b> | <b>Daily GLP-1<br/>RAs</b> | <b>Basal insulin</b> |
|-------------------------------------------------------------------------------------------------------------------------------------------------------------------------------|----------------------------------|----------------------------|----------------------|
| <b>Attrition steps, <i>n</i></b>                                                                                                                                              |                                  |                            |                      |
| Known age and sex within the index period, $\geq 1$ claim for once-weekly GLP-1 RAs, daily GLP-1 RAs or basal insulin                                                         | 14,551                           | 23,003                     | 90,337               |
| Aged $\geq 18$ years                                                                                                                                                          | 14,548                           | 22,998                     | 88,953               |
| Individuals with $\geq 1$ ICD-9/10 code for T2D in 6 months pre-index                                                                                                         | 13,263                           | 19,650                     | 74,307               |
| Individuals without ICD-9/10 codes for T1D or secondary diabetes in 6 months pre-index, and without a code for gestational diabetes in 6 months pre- and 12 months post-index | 12,010                           | 17,515                     | 58,109               |
| Continuous enrolment for $\geq 6$ months pre-index                                                                                                                            | 9970                             | 14,777                     | 47,083               |
| Continuous enrolment for $\geq 12$ months post-index                                                                                                                          | 6430                             | 11,313                     | 35,318               |
| GLP-1 RA- and insulin-naïve (6-month washout period)                                                                                                                          | 4311                             | 5639                       | 19,251               |
| <b>Matched GLP-1 RA cohorts, <i>n</i></b>                                                                                                                                     |                                  |                            |                      |
| Matched by PS                                                                                                                                                                 | 784                              | 784                        | –                    |
| Matched by IPTW                                                                                                                                                               | 4311                             | 5639                       | –                    |

*GLP-1 RA* glucagon-like peptide-1 receptor agonist, *ICD* International Classification of Diseases, *IPTW* inverse probability of treatment weighting, *PS* propensity score, *T1D* type 1 diabetes, *T2D* type 2 diabetes

**Table S2.** Pre-matching baseline characteristics

| <b>Baseline characteristics</b>                               | <b>Once-weekly<br/>GLP-1 RAs<br/><i>n</i> = 4311</b> | <b>Daily GLP-1 RAs<br/><i>n</i> = 5639</b> | <b>Basal insulin<br/><i>n</i> = 19,251</b> |
|---------------------------------------------------------------|------------------------------------------------------|--------------------------------------------|--------------------------------------------|
| Age, years, mean (SD)                                         | 55.3 (10.1)                                          | 55.8 (10.6)                                | 60.4 (12.6)                                |
| Women, n (%)                                                  | 2131 (49.4)                                          | 3163 (56.1)                                | 8867 (46.1)                                |
| Weight, kg, mean (SD)                                         | 107.3 (24.8)                                         | 107.0 (24.3)                               | 98.2 (23.9)                                |
| Body mass index, kg/m <sup>2</sup> , mean (SD)                | 36.7 (7.9)                                           | 36.9 (7.3)                                 | 33.6 (7.5)                                 |
| HbA1c, %, mean (SD)                                           | 8.5 (1.7)                                            | 8.4 (1.7)                                  | 9.7 (2.2)                                  |
| CCI score, mean (SD)                                          | 0.6 (1.1)                                            | 0.6 (1.1)                                  | 1.2 (1.6)                                  |
| <b>Baseline antidiabetic medication, number of claims (%)</b> |                                                      |                                            |                                            |
| Metformin                                                     | 3397 (45.7)                                          | 4044 (45.5)                                | 10,941 (33.9)                              |
| DPP-4is                                                       | 1370 (18.4)                                          | 1533 (17.3)                                | 4882 (15.1)                                |
| SGLT-2is                                                      | 772 (10.4)                                           | 389 (4.4)                                  | 992 (3.1)                                  |
| Sulfonylureas                                                 | 1596 (21.5)                                          | 2035 (22.9)                                | 8191 (25.4)                                |
| GLP-1 RAs                                                     | 0                                                    | 0                                          | 2230 (6.9)                                 |

CCI Charlson Comorbidity Index, DPP-4i dipeptidyl peptidase-4 inhibitor, GLP-1 RA glucagon-like peptide-1 receptor agonist, HbA1c glycated haemoglobin, SGLT-2i sodium–glucose cotransporter-2 inhibitor

**Table S3.** GLP-1 RA use within PS-matched cohorts

| <b>GLP-1 RA</b>              | <b>n</b>   |
|------------------------------|------------|
| <b>Once-weekly GLP-1 RAs</b> | <b>784</b> |
| Dulaglutide                  | 411        |
| Exenatide extended-release   | 369        |
| Semaglutide                  | 4          |
| <b>Daily GLP-1 RAs</b>       | <b>784</b> |
| Liraglutide                  | 701        |
| Exenatide immediate-release  | 83         |

GLP-1 RA glucagon-like peptide-1 receptor agonist

**Table S4** Baseline characteristics of the PS-matched GLP-1 RA cohorts for sensitivity analysis (previous CVD and SGLT-2i use included in matching)

| <b>Baseline characteristics</b>                               | <b>Once-weekly GLP-1 RAs<br/><i>n</i> = 723</b> | <b>Daily GLP-1 RAs<br/><i>n</i> = 723</b> |
|---------------------------------------------------------------|-------------------------------------------------|-------------------------------------------|
| Age, years, mean (SD)                                         | 54.7 (9.9)                                      | 54.9 (10.4)                               |
| Women, n (%)                                                  | 366 (50.6)                                      | 362 (50.1)                                |
| Weight, kg, mean (SD)                                         | 107.1 (24.0)                                    | 108.3 (24.0)                              |
| Body mass index, kg/m <sup>2</sup> , mean (SD)                | 36.6 (7.5)                                      | 36.8 (7.3)                                |
| HbA1c, %, mean (SD)                                           | 8.5 (1.7)                                       | 8.5 (1.7)                                 |
| CCI score, mean (SD)                                          | 0.5 (0.9)                                       | 0.5 (0.9)                                 |
| <b>Baseline antidiabetic medication, number of claims (%)</b> |                                                 |                                           |
| Metformin                                                     | 590 (47.5)                                      | 564 (46.8)                                |
| DPP-4is                                                       | 235 (18.9)                                      | 219 (18.2)                                |
| SGLT-2is                                                      | 103 (8.3)                                       | 75 (6.2)                                  |
| Sulfonylureas                                                 | 280 (22.5)                                      | 286 (23.7)                                |

*CCI* Charlson Comorbidity Index, *CVD* cardiovascular disease; *DPP-4i* dipeptidyl peptidase-4 inhibitor, *GLP-1 RA* glucagon-like peptide-1 receptor agonist, *HbA1c* glycated haemoglobin, *PS* propensity score, *SD* standard deviation, *SGLT-2i* sodium–glucose cotransporter-2 inhibitor

**Table S5** Baseline characteristics of patients not included in the PS-matched cohorts

| <b>Baseline characteristics</b>                               | <b>Once-weekly GLP-1 RAs<br/><i>n</i> = 3527</b> | <b>Daily GLP-1 RAs<br/><i>n</i> = 4855</b> |
|---------------------------------------------------------------|--------------------------------------------------|--------------------------------------------|
| Age, years, mean (SD)                                         | 55.5 (10.1)                                      | 56.0 (10.6)                                |
| Women, n (%)                                                  | 1739 (49.3)                                      | 2761 (56.9)                                |
| Weight, kg, mean (SD)                                         | 107.9 (26.8)                                     | 106.0 (24.0)                               |
| Body mass index, kg/m <sup>2</sup> , mean (SD)                | 37.2 (8.7)                                       | 37.1 (7.4)                                 |
| HbA1c, %, mean (SD)                                           | 8.5 (1.7)                                        | 8.3 (1.8)                                  |
| CCI score, mean (SD)                                          | 0.7 (1.1)                                        | 0.6 (1.1)                                  |
| <b>Baseline antidiabetic medication, number of claims (%)</b> |                                                  |                                            |
| Metformin                                                     | 2753 (78.1)                                      | 3429 (70.6)                                |
| DPP-4is                                                       | 1117 (31.7)                                      | 1296 (26.7)                                |
| SGLT-2is                                                      | 611 (17.3)                                       | 320 (6.6)                                  |
| Sulfonylureas                                                 | 1293 (36.7)                                      | 1733 (35.7)                                |

*CCI* Charlson Comorbidity Index, *DPP-4i* dipeptidyl peptidase-4 inhibitor, *GLP-1 RA* glucagon-like peptide-1 receptor agonist, *HbA1c* glycated haemoglobin, *PS* propensity score, *SD* standard deviation, *SGLT-2i* sodium–glucose cotransporter-2 inhibitor

**Table S6** Baseline characteristics of the IPTW-matched GLP-1 RA cohorts

| Baseline characteristics                                      | Once-weekly GLP-1 RAs |                    | Daily GLP-1 RAs |                    |
|---------------------------------------------------------------|-----------------------|--------------------|-----------------|--------------------|
|                                                               | <i>n</i> = 797        | SMD versus insulin | <i>n</i> = 948  | SMD versus insulin |
| Age, years, mean (SD)                                         | 58.4 (25.7)           | 0.05               | 58.3 (24.0)     | 0.04               |
| Women, %                                                      | 43.3                  | −0.07              | 48.2            | 0.00               |
| Weight, kg, mean (SD)                                         | 101.7 (52.3)          | −0.05              | 101.4 (50.2)    | −0.02              |
| Body mass index, kg/m <sup>2</sup> , mean (SD)                | 34.4 (16.7)           | –                  | 34.7 (14.9)     | –                  |
| HbA1c, %, mean (SD)                                           | 9.6 (5.0)             | −0.04              | 9.6 (5.0)       | −0.09              |
| CCI score, mean (SD)                                          | 0.7 (2.8)             | –                  | 0.7 (2.5)       | –                  |
| <b>Baseline antidiabetic medication, number of claims (%)</b> |                       |                    |                 |                    |
| Metformin                                                     | 652 (46.1)            | −0.03              | 690 (45.7)      | 0.00               |
| DPP-4is                                                       | 257 (18.2)            | 0.09               | 292 (19.3)      | 0.02               |
| SGLT-2is                                                      | 163 (11.5)            | 0.02               | 78 (5.2)        | 0.04               |
| Sulfonylureas                                                 | 307 (21.7)            | 0.08               | 354 (23.4)      | 0.04               |

CCI Charlson Comorbidity Index, DPP-4i dipeptidyl peptidase-4 inhibitor, GLP-1 RA glucagon-like peptide-1 receptor agonist, HbA1c glycated haemoglobin, SGLT-2i sodium–glucose cotransporter-2 inhibitor, SMD standardized mean difference

**Fig. S1** Changes in HbA1c from baseline to 6 months (a) and 12 months (b) post-index in IPTW-matched cohorts

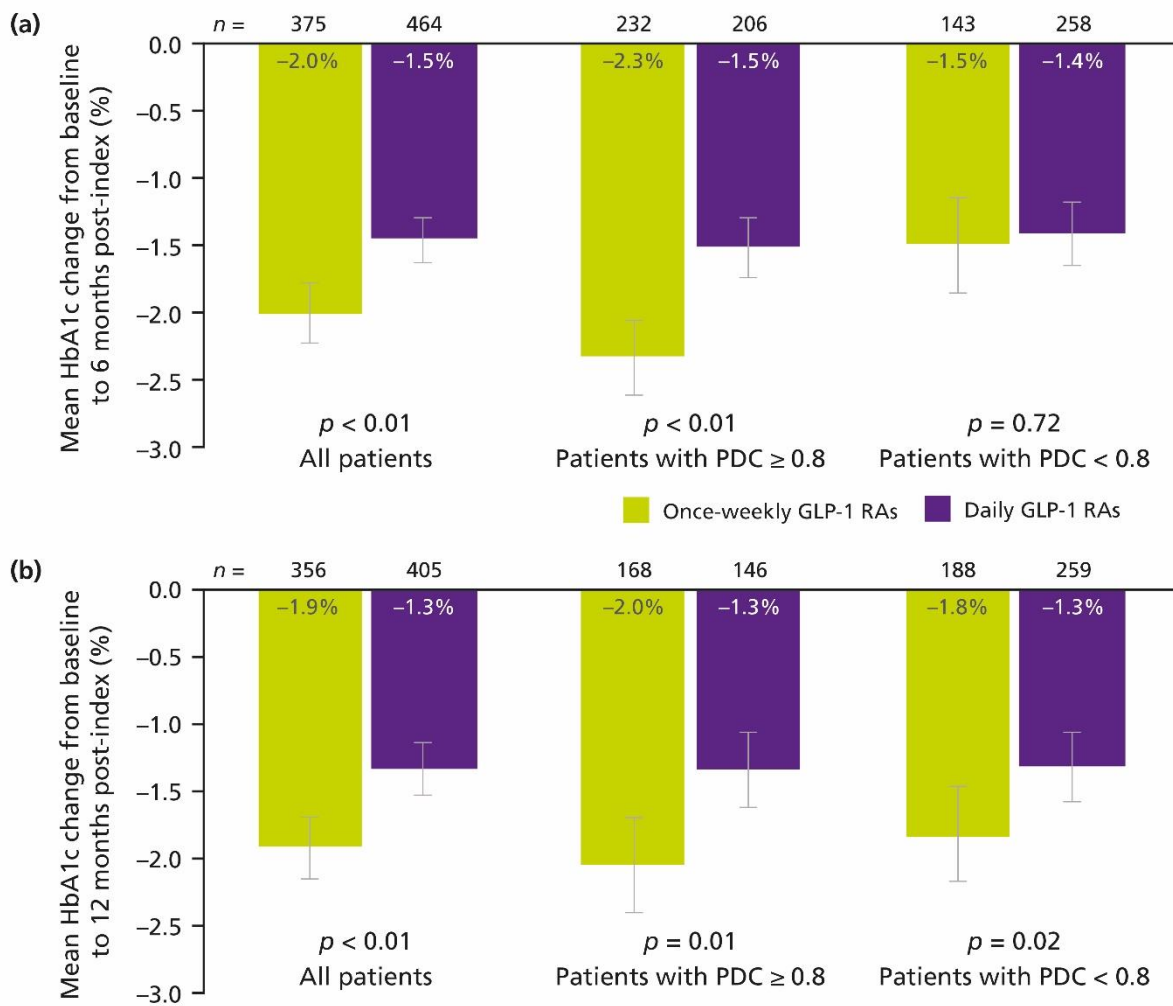

Error bars represent 95% confidence intervals. Note that numbers in bars are rounded to 1 decimal point, whereas plotted data has 2 decimal points

GLP-1 RA glucagon-like peptide-1 receptor agonist, HbA1c glycated haemoglobin, IPTW inverse probability of treatment weighting, PDC proportion of days covered

**Fig. S2** Changes in weight from baseline at 6 months post-index (a) and 12 months post-index (b) in IPTW-matched cohorts

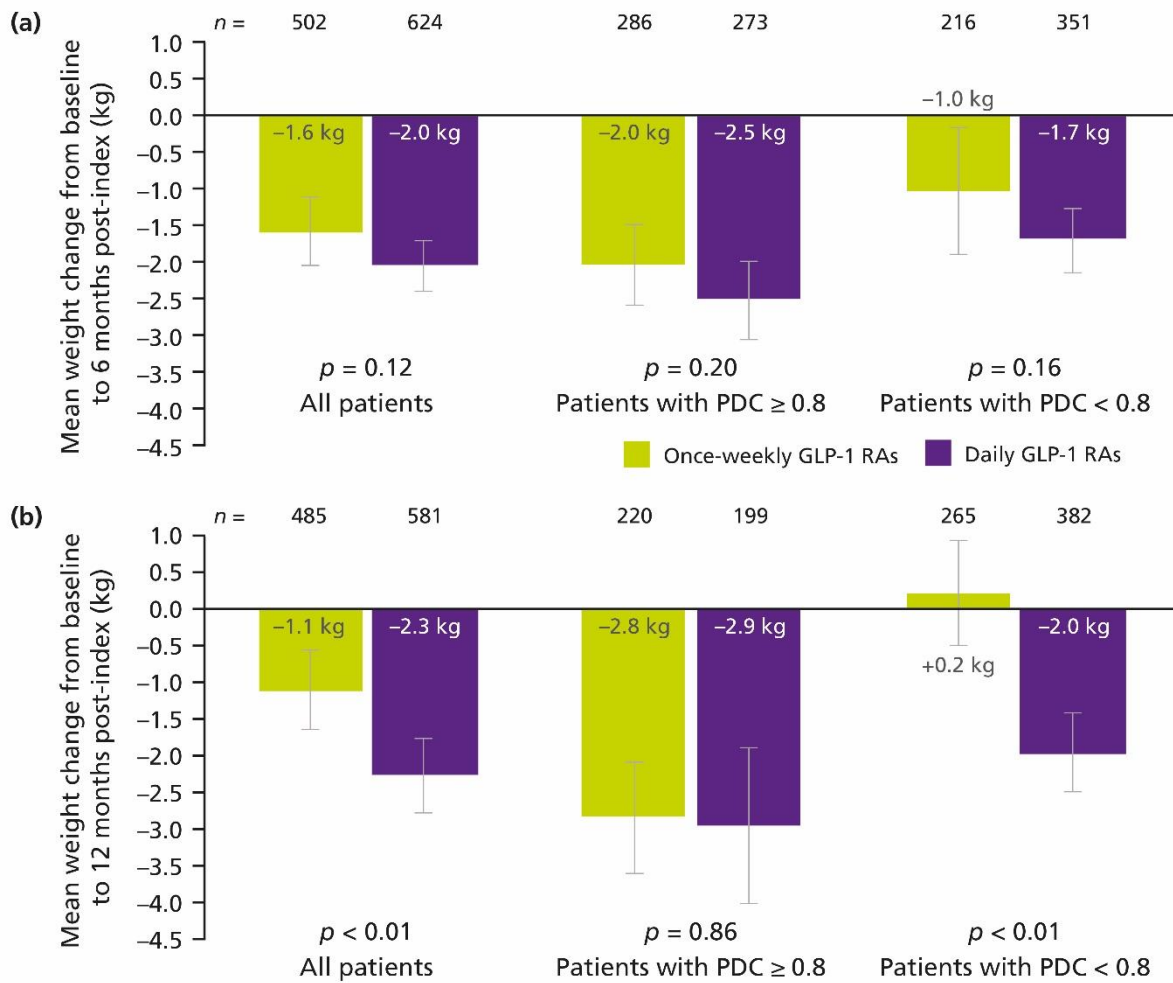

Error bars represent 95% confidence intervals. Note that numbers in bars are rounded to 1 decimal point, whereas plotted data has 2 decimal points

GLP-1 RA glucagon-like peptide-1 receptor agonist, *HbA1c* glycated haemoglobin, IPTW inverse probability of treatment weighting
